# Supplementary material for: MicroRNA-324-5p–CUEDC2 Axis Mediates Gain-of-Function Mutant p53-Driven Cancer Stemness
Source: Oxford University Press journal article supplement (doi:10.1158/1541-7786.mcr-20-0717), 2021-07-13
Supplement: 15417786mcr200717-sup-249658_2_supp_7205710_qv40cb.xlsx [file 15417786mcr200717-sup-249658_2_supp_7205710_qv40cb.xlsx]

## Sheet: miR-324-5p expression NCI60
p53 mutation status and miR-324-5p expression data of NCI 60 cell lines used in the study
Cell line	p53 status	hsa-miR-324-5p expression
CAKI-1	Wild Type	6.96055
UO-31	Wild Type	7.21643
UACC-62	Wild Type	7.04437
ACHN	Wild Type	7.48458
MCF7	Wild Type	7.71375	Outlier removed
LOX IMVI	Wild Type	7.18258
A549/ATCC	Wild Type	7.43108
NCI-H460	Wild Type	7.50783
HCT-116	Wild Type	7.50118
MALME-3M	Wild Type	7.37833
UACC-257	Wild Type	7.59447
SR	Wild Type	7.42885
SK-MEL-5	Wild Type	7.19689
A498	Wild Type	7.01222
HCC-2998	Non-GOF	7.38934
PC-3	Non-GOF	7.50558
SNB-75	Non-GOF	7.25961
SN12C	Non-GOF	7.36223
TK-10	Non-GOF	6.77903
RPMI-8226	Non-GOF	7.29831	Outlier removed
SK-MEL-28	Non-GOF	6.96913
786-0	Non-GOF	7.41139
NCI-H522	Non-GOF	7.79045
NCI-H322M	Non-GOF	7.55031
EKVX	Non-GOF	7.53604
HCT-15	Non-GOF	7.63798
OVCAR-8	Non-GOF	7.24935
KM12	Non-GOF	7.3108
SK-OV-3	Non-GOF	7.04403
HL-60(TB)	Non-GOF	7.30565
HOP-62	Non-GOF	7.62209
NCI-H23	Non-GOF	7.78165
K-562	Non-GOF	7.57789
T-47D	Non-GOF	7.00258
COLO 205	Non-GOF	7.54061
CCRF-CEM	GOF	6.67308	Outlier removed
SF-295	GOF	7.90734
RXF 393	GOF	6.98402
U251	GOF	7.65109
SNB-19	GOF	7.88221
MDA-MB-231/ATCC	GOF	8.16115
BT-549	GOF	7.40976
HS 578T	GOF	7.65233
SF-268	GOF	7.64148
MDA-MB-435	GOF	7.6325
HT29	GOF	7.45273
DU-145	GOF	7.39354
MOLT-4	GOF	7.28407
SK-MEL-2	GOF	7.38385
M14	GOF	7.7722
HOP-92	GOF	8.01135
OVCAR-3	GOF	7.49653
SW-620	GOF	7.4892

## Sheet: CD44 expression NCI60
miR-324-5p and CD44 expression data of NCI 60 cell lines used in the study
Cell line	miR-324-5p expression	CD44 normalised intensity
BR:MDA-MB-231	8.16115	2.75024
LC:HOP-92	8.01135	2.64865
CNS:SF-295	7.90734	3.86074
CNS:SNB-19	7.88221	2.9941
LC:NCI-H23	7.78165	0.123029
ME:M14	7.7722	1.81913
BR:MCF7	7.71375	0.0277352
BR:HS 578T	7.65233	2.49203
CNS:U251	7.65109	3.11907
CNS:SF-268	7.64148	1.16604
ME:MDA-MB-435	7.6325	2.64793
LC:HOP-62	7.62209	0.547453
ME:UACC-257	7.59447	1.04173
LE:K-562	7.57789	0.0700996
LC:NCI-H322M	7.55031	0.13004
CO:COLO 205	7.54061	0.17257
LC:EKVX	7.53604	0.177001
LC:NCI-H460	7.50783	0.148287
PR:PC-3	7.50558	0.609404
CO:HCT-116	7.50118	0.65161
RE:ACHN	7.48458	1.45389
CO:HT29	7.45273	0.257511
LC:A549/ATCC	7.43108	0.80341
LC:NCI-H226	7.4122	2.35649
RE:786-0	7.41139	1.71554
BR:BT-549	7.40977	3.57155
PR:DU-145	7.39354	0.338529
CO:HCC-2998	7.38934	0.137235
ME:SK-MEL-2	7.38385	0.514632
ME:MALME-3M	7.37833	0.684535
OV:OVCAR-4	7.36915	0.113368
RE:SN12C	7.36223	0.70274
LE:HL-60(TB)	7.30565	0.353427
LE:MOLT-4	7.28407	0.14863
CNS:SNB-75	7.25961	1.14993
OV:OVCAR-8	7.24934	0.953928
CNS:SF-539	7.24348	0.991878
RE:UO-31	7.21643	1.45933
OV:IGROV1	7.20583	0.564223
ME:SK-MEL-5	7.19689	0.535914
ME:LOX IMVI	7.18258	2.11673
OV:OVCAR-5	7.16887	0.3366
ME:UACC-62	7.04437	1.46266
OV:SK-OV-3	7.04403	1.18158
RE:A498	7.01222	1.57805
BR:T-47D	7.00258	0.00991775
RE:RXF 393	6.98402	1.8739
ME:SK-MEL-28	6.96913	0.17099
RE:CAKI-1	6.96055	1.33255
RE:TK-10	6.77903	1.73293
LE:CCRF-CEM	6.67308	0.200519
