# Supplementary material for: MicroRNA-324-5p–CUEDC2 Axis Mediates Gain-of-Function Mutant p53-Driven Cancer Stemness
Source: Oxford University Press journal article supplement (doi:10.1158/1541-7786.mcr-20-0717), 2021-07-13
Supplement: 15417786mcr200717-sup-249658_2_supp_7205711_qv40c6.xlsx [file 15417786mcr200717-sup-249658_2_supp_7205711_qv40c6.xlsx]

## Sheet: miR-324-5p exp TCGA
miR-324-5p expression of TCGA-LUAD patients classified according to p53 status.
Null			Missense mutant p53			GOF mutant p53
Patient_ID	hsa-mir-324 expression		miRNA_ID	hsa-mir-324 expression		miRNA_ID	hsa-mir-324 expression
TCGA-05-4396	38.6378		TCGA-05-4382	47.9744		TCGA-05-4384	41.0019
TCGA-05-4402	43.3452		TCGA-05-4384	41.0019		TCGA-05-4395	25.1232
TCGA-44-2656	34.8338		TCGA-05-4395	25.1232		TCGA-05-4424	87.9881
TCGA-50-5941	26.6979		TCGA-05-4398	16.9335		TCGA-44-2662	37.9022
TCGA-55-6712	11.3004		TCGA-05-4405	19.8661		TCGA-44-6147	34.366
TCGA-55-7903	41.1973		TCGA-05-4410	23.5988		TCGA-44-6774	29.6042
TCGA-55-7914	28.2393		TCGA-05-4420	49.379		TCGA-44-6777	15.9948
TCGA-64-1676	37.7221		TCGA-05-4424	87.9881		TCGA-49-4514	52.4511
TCGA-64-1678	56.6206		TCGA-05-4426	33.9415		TCGA-50-6595	23.7721
TCGA-75-6211	20.1593		TCGA-05-4430	32.2721		TCGA-53-7626	14.6223
TCGA-78-7542	39.5058		TCGA-05-4432	75.5548		TCGA-55-7724	28.7349
TCGA-91-6829	36.1844		TCGA-05-5423	36.6857		TCGA-64-1679	25.4805
TCGA-44-2666	25.2273		TCGA-05-5428	22.5672		TCGA-64-5778	36.7358
TCGA-44-5645	34.6861		TCGA-38-4632	22.7315		TCGA-73-4676	15.376
TCGA-44-7662	22.2665		TCGA-38-6178	28.3494		TCGA-75-5147	36.8378
TCGA-49-4490	39.926		TCGA-44-2662	37.9022		TCGA-75-6214	139.07
TCGA-49-6767	36.0813		TCGA-44-3396	33.9684		TCGA-78-7540	15.2397
TCGA-50-5049	28.4643		TCGA-44-6147	34.366		TCGA-91-6840	110.708
TCGA-50-5931	58.0703		TCGA-44-6774	29.6042		TCGA-91-6847	102.593
TCGA-50-5944	11.6764		TCGA-44-6775	22.9228		TCGA-95-7039	47.6354
TCGA-55-1594	72.1171		TCGA-44-6777	15.9948		TCGA-95-7947	67.3221
TCGA-55-7283	34.2334		TCGA-44-6779	22.5619		TCGA-97-7553	16.3878
TCGA-55-7574	28.1553		TCGA-44-7670	49.2171
TCGA-55-7576	25.0565		TCGA-49-4487	36.4705
TCGA-55-7726	14.8396		TCGA-49-4505	43.6222
TCGA-55-7727	53.0523		TCGA-49-4514	52.4511
TCGA-69-7765	27.0719		TCGA-50-5068	18.7831
TCGA-73-7499	35.4063		TCGA-50-5933	14.8708
TCGA-75-6207	25.4906		TCGA-50-5939	36.1571
TCGA-78-7147	29.4226		TCGA-50-6595	23.7721
TCGA-78-7535	48.4518		TCGA-50-6673	131.772
TCGA-44-2659	27.7848		TCGA-53-7626	14.6223
TCGA-50-6593	21.6213		TCGA-55-1592	68.2924
TCGA-97-7938	8.73721		TCGA-55-1596	118.546
TCGA-99-7458	17.6735		TCGA-55-6979	48.0891
			TCGA-55-6985	54.3107
			TCGA-55-7573	27.94
			TCGA-55-7724	28.7349
			TCGA-55-7907	122.183
			TCGA-55-7911	26.3828
			TCGA-64-1679	25.4805
			TCGA-64-1681	27.8895
			TCGA-64-5775	83.6172
			TCGA-64-5778	36.7358
			TCGA-67-3771	72.032
			TCGA-69-7760	20.2729
			TCGA-69-7980	79.4793
			TCGA-73-4676	15.376
			TCGA-75-5146	18.7733
			TCGA-75-5147	36.8378
			TCGA-75-6214	139.07
			TCGA-78-7143	24.4942
			TCGA-78-7145	26.9302
			TCGA-78-7149	56.535
			TCGA-78-7150	23.8589
			TCGA-78-7154	23.5563
			TCGA-78-7155	121.362
			TCGA-78-7536	66.2227
			TCGA-78-7540	15.2397
			TCGA-86-6851	80.0052
			TCGA-91-6840	110.708
			TCGA-91-6847	102.593
			TCGA-95-7039	47.6354
			TCGA-95-7043	77.6258
			TCGA-95-7567	16.0285
			TCGA-95-7947	67.3221
			TCGA-97-7553	16.3878
			TCGA-97-7554	20.9414

## Sheet: CUEDC2 exp TCGA
CUEDC2 expression of TCGA-LUAD patients classified according to TP53 mutation status.
Wild type			Null			Missense mutant			GOF mutant
Patient ID	CUEDC2 expression		Patient ID	CUEDC2 expression		Patient ID	CUEDC2 expression		Patient ID	CUEDC2 expression
TCGA-05-4249	9.32494		TCGA-05-4396	9.53277		TCGA-05-4382	9.89366		TCGA-05-4384	9.60183
TCGA-05-4389	10.3944		TCGA-05-4402	9.74028		TCGA-05-4384	9.60183		TCGA-05-4395	10.0953
TCGA-05-4390	9.77626		TCGA-44-2656	10.0216		TCGA-05-4395	10.0953		TCGA-05-4424	9.18955
TCGA-05-4403	9.63853		TCGA-50-5941	9.27881		TCGA-05-4398	9.10961		TCGA-44-2662	9.56548
TCGA-05-4415	9.90756		TCGA-55-6712	9.29731		TCGA-05-4405	9.54839		TCGA-44-6147	9.34974
TCGA-05-4417	9.70434		TCGA-55-7903	9.66296		TCGA-05-4410	8.72898		TCGA-44-6774	9.56143
TCGA-05-4418	10.1026		TCGA-55-7914	9.69712		TCGA-05-4420	10.1915		TCGA-44-6777	9.6582
TCGA-05-4422	10.5976		TCGA-64-1676	9.93212		TCGA-05-4424	9.18955		TCGA-49-4514	10.3935
TCGA-05-4425	9.77072		TCGA-64-1677	9.83364		TCGA-05-4426	10.3424		TCGA-50-6595	9.64386
TCGA-05-4433	8.75842		TCGA-64-1678	10.9368		TCGA-05-4430	10.2878		TCGA-53-7626	9.44409
TCGA-05-5420	10.2366		TCGA-75-6211	9.66059		TCGA-05-4432	10.5534		TCGA-55-7724	8.59535
TCGA-05-5429	8.99122		TCGA-78-7542	9.29151		TCGA-05-5423	10.1028		TCGA-64-1679	9.62553
TCGA-05-5715	9.04175		TCGA-91-6829	9.75784		TCGA-05-5428	10.215		TCGA-64-5778	9.88258
TCGA-35-3615	10.2987		TCGA-75-7031	9.29699		TCGA-38-4632	10.6777		TCGA-73-4676	9.60234
TCGA-38-4626	9.7366		TCGA-44-2666	9.90699		TCGA-38-6178	9.09693		TCGA-75-5147	10.1183
TCGA-38-4627	10.1878		TCGA-44-5645	9.46638		TCGA-44-2662	9.56548		TCGA-75-6214	9.41063
TCGA-38-4628	10.5178		TCGA-44-7662	9.3468		TCGA-44-3396	9.8645		TCGA-78-7540	8.91543
TCGA-38-4631	9.56321		TCGA-49-4490	9.61032		TCGA-44-6147	9.34974		TCGA-91-6840	8.78921
TCGA-44-2655	10.1656		TCGA-49-6767	9.47899		TCGA-44-6774	9.56143		TCGA-91-6847	9.36116
TCGA-44-2657	9.39191		TCGA-50-5049	9.80409		TCGA-44-6775	9.14563		TCGA-95-7039	10.0421
TCGA-44-2661	9.78202		TCGA-50-5931	10.4721		TCGA-44-6777	9.6582		TCGA-95-7947	8.59575
TCGA-44-2665	10.0972		TCGA-50-5944	9.43373		TCGA-44-6779	8.95337		TCGA-97-7553	9.43001
TCGA-44-3919	9.41284		TCGA-55-1594	10.0016		TCGA-44-7670	9.60269
TCGA-44-4112	10.2471		TCGA-55-7283	9.70232		TCGA-49-4487	9.82682
TCGA-44-6145	9.40343		TCGA-55-7574	9.22528		TCGA-49-4505	9.9151
TCGA-44-6146	8.68176		TCGA-55-7576	9.1583		TCGA-49-4514	10.3935
TCGA-44-6776	9.37771		TCGA-55-7726	8.28284		TCGA-50-5068	10.5847
TCGA-44-7659	9.55147		TCGA-55-7727	8.78856		TCGA-50-5933	8.83344
TCGA-44-7671	9.84458		TCGA-69-7765	9.1064		TCGA-50-5939	9.67631
TCGA-44-7672	9.70938		TCGA-73-7499	9.7279		TCGA-50-6595	9.64386
TCGA-49-4486	10.7755		TCGA-75-6207	10.0315		TCGA-50-6673	9.16287
TCGA-49-4488	9.91103		TCGA-78-7147	9.76055		TCGA-53-7626	9.44409
TCGA-49-4494	9.84103		TCGA-78-7535	9.6711		TCGA-55-1592	9.50197
TCGA-49-4501	10.224		TCGA-44-2659	9.74724		TCGA-55-1596	10.5396
TCGA-49-4506	9.78448		TCGA-50-6593	10.2359		TCGA-55-6979	9.36234
TCGA-49-4507	10.3727		TCGA-97-7938	9.1327		TCGA-55-6985	9.52321
TCGA-49-4510	10.3725		TCGA-99-7458	9.6297		TCGA-55-7573	9.29945
TCGA-49-4512	9.90925					TCGA-55-7724	8.59535
TCGA-49-6742	9.45167					TCGA-55-7907	9.36095
TCGA-49-6744	9.64367					TCGA-55-7911	10.0432
TCGA-49-6745	9.66933					TCGA-64-1679	9.62553
TCGA-49-6761	10.0572					TCGA-64-1681	9.83159
TCGA-50-5044	10.3966					TCGA-64-5775	10.2446
TCGA-50-5051	10.5966					TCGA-64-5778	9.88258
TCGA-50-5055	9.97415					TCGA-67-3771	9.29465
TCGA-50-5072	9.41213					TCGA-69-7760	9.88708
TCGA-50-5932	9.88818					TCGA-69-7980	9.53814
TCGA-50-5935	10.0192					TCGA-73-4676	9.60234
TCGA-50-5936	9.91862					TCGA-75-5146	10.3464
TCGA-50-5942	9.55794					TCGA-75-5147	10.1183
TCGA-50-6597	10.2444					TCGA-75-6214	9.41063
TCGA-50-6597	10.2444					TCGA-78-7143	9.44149
TCGA-53-7813	9.43181					TCGA-78-7145	9.60799
TCGA-55-6543	9.55449					TCGA-78-7149	10.2608
TCGA-55-6642	9.62626					TCGA-78-7150	9.14094
TCGA-55-6970	9.69708					TCGA-78-7154	9.5056
TCGA-55-6971	8.82352					TCGA-78-7155	9.1042
TCGA-55-6972	10.851					TCGA-78-7536	9.28398
TCGA-55-6978	9.83144					TCGA-78-7540	8.91543
TCGA-55-6980	9.35378					TCGA-86-6851	9.12623
TCGA-55-6981	9.04698					TCGA-91-6840	8.78921
TCGA-55-6982	9.16341					TCGA-91-6847	9.36116
TCGA-55-6983	9.86021					TCGA-95-7039	10.0421
TCGA-55-6986	9.63623					TCGA-95-7043	9.32989
TCGA-55-7281	9.56139					TCGA-95-7567	10.1549
TCGA-55-7725	8.6484					TCGA-95-7947	8.59575
TCGA-55-7728	9.62598					TCGA-97-7553	9.43001
TCGA-64-1680	10.0808					TCGA-97-7554	9.51346
TCGA-64-5774	9.88098
TCGA-64-5781	10.085
TCGA-67-3772	9.77699
TCGA-67-3773	10.1056
TCGA-67-3774	9.84099
TCGA-67-6215	9.52703
TCGA-67-6216	9.77153
TCGA-67-6217	9.6581
TCGA-69-7761	8.92392
TCGA-69-7763	9.56454
TCGA-69-7764	9.61316
TCGA-71-6725	9.36958
TCGA-73-4658	10.0196
TCGA-73-4659	10.0411
TCGA-73-4662	9.55466
TCGA-73-4675	9.7967
TCGA-73-7498	9.75215
TCGA-75-5122	9.5967
TCGA-75-5126	10.1068
TCGA-75-6203	9.35024
TCGA-75-6205	9.8165
TCGA-75-6212	9.32877
TCGA-75-7025	9.22299
TCGA-75-7027	9.88592
TCGA-75-7030	9.43176
TCGA-78-7148	9.62513
TCGA-78-7152	9.73533
TCGA-78-7153	10.4726
TCGA-78-7156	9.79552
TCGA-78-7158	9.87052
TCGA-78-7159	9.85771
TCGA-78-7160	9.49034
TCGA-78-7161	10.0742
TCGA-78-7162	10.0171
TCGA-78-7163	9.89609
TCGA-78-7166	9.7924
TCGA-78-7167	9.23524
TCGA-78-7537	10.0681
TCGA-78-7539	9.69294
TCGA-78-7633	9.68296
TCGA-80-5607	9.57596
TCGA-80-5608	9.86254
TCGA-86-6562	9.59909
TCGA-86-7713	8.56149
TCGA-86-7714	9.25923
TCGA-91-6828	9.24932
TCGA-91-6835	8.96383
TCGA-91-6849	9.6947
TCGA-91-7771	9.83108
TCGA-93-7347	9.96129
TCGA-93-7348	9.34696
TCGA-95-7948	10.0348
TCGA-97-7546	8.97629
TCGA-97-7552	8.99344
TCGA-97-7937	8.55326
TCGA-97-7941	9.48541
