# Supplementary material for: MicroRNA-324-5p–CUEDC2 Axis Mediates Gain-of-Function Mutant p53-Driven Cancer Stemness
Source: Oxford University Press journal article supplement (doi:10.1158/1541-7786.mcr-20-0717), 2021-07-13
Supplement: 15417786mcr200717-sup-249658_2_supp_7205712_qv40cg.xlsx [file 15417786mcr200717-sup-249658_2_supp_7205712_qv40cg.xlsx]

## Sheet: mir-324-5p exp and OS TCGA
Survival data and p53 mutation status of TCGA-LUAD patients used in the study.
Patient ID	p53 status	p53 mutation	miR-324-5p expression	Overall Survival (Months)	Event	Lymph Node status	Cancer Metastasis Stage Code	Cancer Tumor Stage Code
TCGA-05-4382	Mutant	p.V272G	47.9744	19.94	0	N0	M0	T2
TCGA-05-4384	Mutant	p.Y205C	41.0019	13.99	0	N2	M0	T2
TCGA-05-4396	Mutant	p.K139fs	38.6378	9.95	1	N1	M0	T4
TCGA-05-4398	Mutant	p.G105D	16.9335	47.01	0	N3	M0	T4
TCGA-05-4402	Mutant	p.V173fs	43.3452	8.02	1	NX	M1	T2
TCGA-05-4405	Mutant	p.C277F	19.8661	20.04	0	N0	M0	T2
TCGA-05-4420	Mutant	p.R280I	49.379	29.96	0	N0	M0	T2
TCGA-05-4424	Mutant	p.L194R	87.9881	29.99	0	N0	M0	T3
TCGA-05-4426	Mutant	p.T155I	33.9415	25.99	0	N0	M0	T2
TCGA-05-4430	Mutant	p.R249M	32.2721	25	0	N0	M0	T2
TCGA-05-4432	Mutant	p.D281E	75.5548	25	0	N1	M0	T2
TCGA-05-5423	Mutant	p.R249M	36.6857	4.96	0	N1	M0	T2
TCGA-05-5428	Mutant	p.C238Y	22.5672	22.01	0	N1	M0	T1b
TCGA-38-4632	Mutant	p.A159P	22.7315	44.58	1	N1	M1	T2
TCGA-38-6178	Mutant	p.R283P	28.3494	14.72	0	N2	NA	T2b
TCGA-44-2656	Mutant	p.V73fs	34.8338	46.94	0	N0	M0	T2
TCGA-44-2659	Mutant	p.Y126_splice	27.7848	44.91	0	N1	M0	T1
TCGA-44-2662	Mutant	p.R280T	37.9022	42.05	0	N0	M0	T2
TCGA-44-2666	Mutant	p.R196*	25.2273	3.19	1	N0	M0	T2
TCGA-44-3396	Mutant	p.E286G	33.9684	37.12	0	N2	M0	T2
TCGA-44-5645	Mutant	p.Q354*	34.6861	27.99	0	NX	NA	T1
TCGA-44-6147	Mutant	p.R110L	34.366	27.76	0	NX	M0	T1b
TCGA-44-6774	Mutant	p.G245C	29.6042	21.62	0	N2	M0	T1
TCGA-44-6775	Mutant	p.H168L	22.9228	23.16	0	N0	MX	T2a
TCGA-44-6777	Mutant	p.G245V	15.9948	32.42	1	NX	MX	T2
TCGA-44-6779	Mutant	p.K132E	22.5619	16.43	1	N1	MX	T2
TCGA-44-7662	Mutant	p.E68*	22.2665	7.16	0	N0	MX	T2a
TCGA-44-7670	Mutant	p.R337L	49.2171	28.98	0	N1	M0	T1b
TCGA-49-4487	Mutant	p.P77L	36.4705	28.09	1	N0	M0	T1
TCGA-49-4490	Mutant	p.R213*	39.926	12.65	1	N2	M0	T3
TCGA-49-4505	Mutant	p.C277F	43.6222	14.06	1	N1	M0	T2
TCGA-49-4514	Mutant	p.R175H	52.4511	55.85	0	N0	M0	T1
TCGA-49-6767	Mutant	p.Q331*	36.0813	22.24	0	N0	MX	T3
TCGA-50-5049	Mutant	p.E298*	28.4643	101.64	0	N0	M0	T2
TCGA-50-5068	Mutant	p.V216M	18.7831	49.24	1	N1	MX	T2
TCGA-50-5931	Mutant	p.W91*	58.0703	14.26	1	N0	M0	T2
TCGA-50-5933	Mutant	p.R158L	14.8708	78.61	1	N2	M0	T4
TCGA-50-5939	Mutant	p.E285K	36.1571	15.11	1	N0	M0	T2
TCGA-50-5941	Mutant	p.P72fs	26.6979	48.42	0	N2	M0	T2a
TCGA-50-5944	Mutant	p.E285*	11.6764	57.49	0	N0	M0	T1
TCGA-50-6593	Mutant	p.V225_splice	21.6213	11.04	1	N2	M0	T1
TCGA-50-6595	Mutant	p.R175H	23.7721	6.21	1	N2	M0	T2
TCGA-50-6673	Mutant	p.R337C	131.772	0.72	1	N0	M0	T1
TCGA-53-7626	Mutant	p.M237I	14.6223	30.52	1	N1	M0	T1
TCGA-55-1592	Mutant	p.G244C	68.2924	23.03	1	N0	M0	T2
TCGA-55-1594	Mutant	p.S166*	72.1171	38.7	0	N2	M0	T2
TCGA-55-1596	Mutant	p.D281Y	118.546	67.84	0	N1	M0	T2
TCGA-55-6712	Mutant	p.E339fs	11.3004	5.62	1	N1	MX	T2a
TCGA-55-6979	Mutant	p.Q144L	48.0891	7.79	1	N1	M0	T2
TCGA-55-6985	Mutant	p.G334V	54.3107	40.51	0	N0	MX	T2
TCGA-55-7283	Mutant	p.Q144*	34.2334	20.01	0	N2	MX	T3
TCGA-55-7573	Mutant	p.C135F	27.94	16	0	N0	MX	T1b
TCGA-55-7574	Mutant	p.E346*	28.1553	32.69	1	N0	M0	T2a
TCGA-55-7576	Mutant	p.Q317*	25.0565	22.01	0	N0	M0	T2a
TCGA-55-7724	Mutant	p.R273H	28.7349	23.16	0	N0	MX	T2a
TCGA-55-7726	Mutant	p.C141*	14.8396	21.42	0	N0	MX	T1b
TCGA-55-7727	Mutant	p.Q52*	53.0523	3.91	0	N2	MX	T1a
TCGA-55-7903	Mutant	p.L35fs	41.1973	18.63	0	N0	MX	T1b
TCGA-55-7907	Mutant	p.R158P	122.183	11.27	1	N1	MX	T2a
TCGA-55-7911	Mutant	p.Q144H	26.3828	17.64	0	N0	MX	T1a
TCGA-55-7914	Mutant	p.E294fs	28.2393	6.14	1	N1	MX	T1b
TCGA-64-1676	Mutant	p.C229fs	37.7221	56.77	0	N0	M0	T1a
TCGA-64-1677	Mutant	p.D48fs	114.973	20.63	1	N2	M0	T2
TCGA-64-1678	Mutant	p.V143fs	56.6206	39.06	0	N0	M0	T2b
TCGA-64-1679	Mutant	p.G245V	25.4805	81.73	0	N2	M0	T1
TCGA-64-1681	Mutant	p.E180K	27.8895	38.34	1	N0	M0	T1
TCGA-64-5775	Mutant	p.R280G	83.6172	2.04	1	N0	M0	T4
TCGA-64-5778	Mutant	p.N239S	36.7358	42.87	0	N0	M0	T2
TCGA-67-3771	Mutant	p.S127C	72.032	20.04	0	N0	M0	T1
TCGA-69-7760	Mutant	p.F270V	20.2729	6.64	0	N0	M0	T3
TCGA-69-7765	Mutant	p.Q167*	27.0719	5.42	0	N0	MX	T4
TCGA-69-7980	Mutant	p.A161V	79.4793	13.5	0	N0	M0	T1b
TCGA-73-4676	Mutant	p.C176F	15.376	9.23	1	N1	M0	T2a
TCGA-73-7499	Mutant	p.R196*	35.4063	50.3	1	N0	M0	T2a
TCGA-75-5146	Mutant	p.P278H	18.7733	77.79	0	N0	M0	T2
TCGA-75-5147	Mutant	p.Y163C	36.8378	43.79	0	N0	M0	T2
TCGA-75-6214	Mutant	p.V157F	139.07	36.63	1	N2	M0	T2
TCGA-78-7143	Mutant	p.R181H	24.4942	162.98	1	N0	M0	T2
TCGA-78-7145	Mutant	p.A159P	26.9302	27.14	1	N1	M1	T4
TCGA-78-7147	Mutant	p.Y236*	29.4226	19.25	1	N1	M0	T2
TCGA-78-7149	Mutant	p.R248L	56.535	129.43	0	N0	M0	T4
TCGA-78-7150	Mutant	p.R158L	23.8589	21.88	1	N1	M0	T2
TCGA-78-7154	Mutant	p.E271K	23.5563	19.48	1	N2	M0	T3
TCGA-78-7155	Mutant	p.R337L	121.362	38.47	1	N0	M0	T2
TCGA-78-7535	Mutant	p.Q192*	48.4518	31.18	1	N0	M0	T2
TCGA-78-7536	Mutant	p.F270C	66.2227	8.02	1	N2	M0	T2
TCGA-78-7540	Mutant	p.R273C	15.2397	39.32	1	N0	M0	T2
TCGA-78-7542	Mutant	p.P152fs	39.5058	10.55	1	N0	M0	T2
TCGA-86-6851	Mutant	p.E258D	80.0052	5.88	0	N1	M0	T1b
TCGA-91-6829	Mutant	p.P72fs	36.1844	41.33	1	N0	MX	T2
TCGA-91-6840	Mutant	p.Y220C	110.708	12.22	0	N0	M0	T1b
TCGA-91-6847	Mutant	p.R110L	102.593	27.66	0	N0	MX	T2
TCGA-95-7039	Mutant	p.R273L	47.6354	41.79	0	N0	MX	T3
TCGA-95-7043	Mutant	p.R158L	77.6258	16.52	1	N0	MX	T1a
TCGA-95-7567	Mutant	p.Y205H	16.0285	18.66	0	N1	M0	T2b
TCGA-95-7947	Mutant	p.Y205C	67.3221	15.67	0	N0	M0	T1a
TCGA-97-7553	Mutant	p.R282W	16.3878	61.43	0	N0	MX	T1
TCGA-97-7554	Mutant	p.R249W	20.9414	25.46	0	N2	M0	T2a
TCGA-97-7938	Mutant	p.T125_splice	8.73721	0.59	1	N0	MX	T1a
TCGA-99-7458	Mutant	p.G187_splice	17.6735	24.54	0	N0	M0	T4
TCGA-05-4249	Wild type		15.921	50.03	0	N0	M0	T2
TCGA-05-4389	Wild type		61.8149	44.97	0	N0	M0	T1
TCGA-05-4390	Wild type		52.8373	36.99	0	N0	M0	T2
TCGA-05-4403	Wild type		15.3257	18.99	0	N0	M0	T2
TCGA-05-4415	Wild type		64.2208	2.99	1	N2	M0	T4
TCGA-05-4417	Wild type		24.5815	14.95	0	N0	M0	T2
TCGA-05-4418	Wild type		115.053	9	1	N2	M0	T3
TCGA-05-4422	Wild type		64.8463	11.99	0	N0	M0	T2
TCGA-05-4425	Wild type		25.9141	21.98	0	N0	M1	T2
TCGA-05-4433	Wild type		33.4658	23.98	0	N0	M0	T2
TCGA-05-5420	Wild type		35.8143	15.01	0	N2	M0	T2
TCGA-05-5429	Wild type		20.382	9.03	1	N2	M0	T3
TCGA-05-5715	Wild type		72.6693	2.04	0	N0	M0	T2a
TCGA-35-3615	Wild type		120.21	0.46	0	N0	M0	T2
TCGA-38-4626	Wild type		94.6163	120.7	0	N0	M0	T2b
TCGA-38-4627	Wild type		44.983	37.68	1	N1	M0	T1b
TCGA-38-4628	Wild type		112.038	49.01	1	N1	M0	T2
TCGA-38-4631	Wild type		34.5932	11.63	1	N0	M0	T2
TCGA-44-2655	Wild type		56.3045	43.5	0	N0	M0	T1
TCGA-44-2657	Wild type		23.061	44.38	0	NX	M0	T2
TCGA-44-2661	Wild type		6.5629	38.07	0	N0	M0	T1
TCGA-44-2665	Wild type		25.0207	42.74	0	N1	M0	T2
TCGA-44-3919	Wild type		38.1381	33.71	1	N0	M0	T1
TCGA-44-4112	Wild type		29.2091	26.54	1	N0	M0	T2a
TCGA-44-6145	Wild type		25.8384	19.55	0	N0	M0	T1
TCGA-44-6146	Wild type		46.7457	23.92	0	N0	M0	T3
TCGA-44-6776	Wild type		33.0914	85.94	0	N0	MX	T1
TCGA-44-7659	Wild type		26.9352	22.7	0	N0	MX	T1b
TCGA-44-7671	Wild type		28.732	29.2	0	N0	M0	T2a
TCGA-44-7672	Wild type		15.1827	23.62	0	N0	M0	T1b
TCGA-49-4486	Wild type		38.3719	76.15	1	N0	M0	T1
TCGA-49-4488	Wild type		77.5787	28.55	1	N0	MX	T1
TCGA-49-4494	Wild type		52.182	35.51	1	N2	M0	T3
TCGA-49-4501	Wild type		66.2891	46.68	1	N0	M0	T2
TCGA-49-4506	Wild type		43.3252	32.82	1	N1	M0	T2
TCGA-49-4507	Wild type		43.3086	8.8	1	N1	M0	T3
TCGA-49-4510	Wild type		60.4561	29.43	1	N1	M0	T2
TCGA-49-4512	Wild type		46.6304	29.73	1	N2	MX	T2
TCGA-49-6742	Wild type		49.9143	16.03	1	N1	M0	T2a
TCGA-49-6744	Wild type		18.2293	55.29	0	N1	MX	T2a
TCGA-49-6745	Wild type		19.6444	17.15	0	N2	M0	T2a
TCGA-49-6761	Wild type		55.1183	11.63	0	N2	MX	T1
TCGA-50-5044	Wild type		25.9412	20.5	1	N1	M0	T4
TCGA-50-5051	Wild type		27.5661	15.7	1	N2	M0	T2
TCGA-50-5055	Wild type		37.2579	60.12	1	N1	M0	T1
TCGA-50-5072	Wild type		49.8667	8.21	1	N2	M0	T2
TCGA-50-5932	Wild type		48.2398	40.57	1	N1	M0	T2
TCGA-50-5935	Wild type		51.4319	21.45	1	N0	M0	T1
TCGA-50-5936	Wild type		24.8785	8.44	1	N2	M0	T2
TCGA-50-5942	Wild type		28.7217	60.68	0	N0	M0	T1
TCGA-50-6597	Wild type		34.5285	41.66	1	N0	M0	T2
TCGA-50-7109	Wild type		15.2866	10.12	1	N0	M0	T1
TCGA-53-7813	Wild type		36.5021	13.93	0	N0	M0	T4
TCGA-55-6543	Wild type		32.1803	14.29	0	N0	MX	T1b
TCGA-55-6642	Wild type		19.5032	80.45	0	N0	MX	T2
TCGA-55-6970	Wild type		62.5791	15.24	1	N2	MX	T2
TCGA-55-6971	Wild type		50.0898	45.99	0	N0	MX	T2
TCGA-55-6972	Wild type		100.271	53.61	1	N0	M0	T2
TCGA-55-6978	Wild type		45.7734	5.78	1	N0	MX	T2b
TCGA-55-6980	Wild type		61.385	69.28	0	N0	M0	T1
TCGA-55-6981	Wild type		59.9006	45.3	1	N2	M0	T1
TCGA-55-6982	Wild type		51.6105	32.69	1	N1	M0	T2
TCGA-55-6983	Wild type		81.0864	92.74	0	N1	M0	T2
TCGA-55-6986	Wild type		104.515	107.13	0	N0	M0	T2
TCGA-55-7281	Wild type		16.6268	28.65	0	N0	M0	T1b
TCGA-55-7725	Wild type		15.3808	14.52	0	N0	MX	T1a
TCGA-55-7728	Wild type		34.9862	23.13	0	N0	MX	T2a
TCGA-55-7815	Wild type		26.7693	25.39	0	N0	MX	T2a
TCGA-64-1680	Wild type		12.5407	36.99	0	N2	M1	T2a
TCGA-64-5774	Wild type		24.4776	87.91	0	N0	M0	T2
TCGA-64-5781	Wild type		22.7804	51.22	0	N0	M0	T2
TCGA-67-3772	Wild type		56.3851	18.82	0	N0	M0	T2
TCGA-67-3773	Wild type		13.5113	14.03	0	N0	M0	T2
TCGA-67-3774	Wild type		130.579	12.65	0	N0	M0	T2
TCGA-67-6215	Wild type		30.4805	5.72	0	N0	M0	T2a
TCGA-67-6216	Wild type		17.5178	4.63	0	N0	M0	T1a
TCGA-67-6217	Wild type		64.3997	13.86	0	N1	M0	T2a
TCGA-69-7761	Wild type		16.5323	6.11	0	N0	MX	T2a
TCGA-69-7763	Wild type		17.538	22.67	0	N0	M0	T1b
TCGA-69-7764	Wild type		14.1097	13.6	0	N0	M0	T1b
TCGA-71-6725	Wild type		40.6819	8.41	0	N0	M0	T2
TCGA-73-4658	Wild type		12.6532	52.56	1	N0	M0	T2
TCGA-73-4659	Wild type		46.0638	23.36	1	N2	M0	T2
TCGA-73-4662	Wild type		66.2456	82.62	0	N0	M0	T1
TCGA-73-4675	Wild type		50.3131	30.29	1	N1	M0	T3
TCGA-73-7498	Wild type		76.7454	39.06	0	N0	M0	T1b
TCGA-75-6212	Wild type		25.1439	49.8	1	N1	M0	T2
TCGA-75-7025	Wild type		73.0267	108.57	0	N0	M0	T2
TCGA-75-7027	Wild type		40.7146	100.49	0	N0	M0	T2
TCGA-78-7148	Wild type		34.8235	20.57	1	N1	M0	T2
TCGA-78-7152	Wild type		20.6065	39.91	1	N0	M0	T2
TCGA-78-7153	Wild type		35.1799	119.42	0	N0	M0	T2
TCGA-78-7156	Wild type		41.3256	32.06	1	N1	M1	T4
TCGA-78-7158	Wild type		19.201	5.88	1	N2	M0	T4
TCGA-78-7159	Wild type		55.079	64.85	0	NX	M0	T1
TCGA-78-7160	Wild type		36.3341	22.9	1	N2	M1	T4
TCGA-78-7161	Wild type		89.1753	9.56	1	N0	M0	T3
TCGA-78-7162	Wild type		35.4601	104.11	1	N0	M0	T1
TCGA-78-7163	Wild type		61.273	238.11	0	N0	M0	T2
TCGA-78-7166	Wild type		22.5973	8.48	1	N1	M0	T2
TCGA-78-7167	Wild type		77.5621	88.07	1	N0	M1	T2
TCGA-78-7537	Wild type		26.1081	53.29	1	N0	M0	T2
TCGA-78-7539	Wild type		31.7774	25.99	0	N0	M0	T2b
TCGA-78-7633	Wild type		44.9917	50.2	1	N0	M0	T2
TCGA-80-5608	Wild type		118.802	93.04	0	N0	M0	T1
TCGA-86-6562	Wild type		42.8545	12.35	1	N1	M0	T2a
TCGA-86-7713	Wild type		34.3858	38.01	0	N0	M0	T2b
TCGA-86-7714	Wild type		24.3436	20.53	1	N2	M0	T1b
TCGA-91-6828	Wild type		56.068	10.61	0	N0	M0	T1a
TCGA-91-6835	Wild type		22.0502	2.6	0	N0	M0	T1
TCGA-91-6849	Wild type		156.006	1.15	0	N2	MX	T2
TCGA-91-7771	Wild type		18.2433	16.16	0	N0	MX	T3
TCGA-93-7347	Wild type		43.8173	22.44	0	N0	MX	T1a
TCGA-93-7348	Wild type		26.9332	17.44	0	N0	MX	T1a
TCGA-95-7948	Wild type		53.0112	15.64	0	N0	M0	T2a
TCGA-97-7546	Wild type		32.5466	42.21	0	N0	MX	T1
TCGA-97-7552	Wild type		18.233	63.47	0	N0	MX	T2
TCGA-97-7937	Wild type		27.459	18.53	0	N0	MX	T2a
TCGA-97-7941	Wild type		85.4493	15.9	0	N0	MX	T1b

## Sheet: miR-324-5p low
Patient ID	p53 status	p53 mutation	miR-324-5p expression	Overall Survival (Months)	Event	Disease Free Status	Sex	Disease Free (Months)
TCGA-97-7938	Mutant	p.T125_splice	8.73721	0.59	1	NA	Female	NA
TCGA-55-6712	Mutant	p.E339fs	11.3004	5.62	1	NA	Male	NA
TCGA-50-5944	Mutant	p.E285*	11.6764	57.49	0	DiseaseFree	Female	57.49
TCGA-53-7626	Mutant	p.M237I	14.6223	30.52	1	Recurred/Progressed	Female	28.42
TCGA-55-7726	Mutant	p.C141*	14.8396	21.42	0	DiseaseFree	Female	21.42
TCGA-50-5933	Mutant	p.R158L	14.8708	78.61	1	NA	Male	NA
TCGA-78-7540	Mutant	p.R273C	15.2397	39.32	1	NA	Female	NA
TCGA-73-4676	Mutant	p.C176F	15.376	9.23	1	NA	Male	NA
TCGA-44-6777	Mutant	p.G245V	15.9948	32.42	1	NA	Female	NA
TCGA-95-7567	Mutant	p.Y205H	16.0285	18.66	0	DiseaseFree	Male	18.66
TCGA-97-7553	Mutant	p.R282W	16.3878	61.43	0	DiseaseFree	Female	61.43
TCGA-05-4398	Mutant	p.G105D	16.9335	47.01	0	DiseaseFree	Female	47.01
TCGA-99-7458	Mutant	p.G187_splice	17.6735	24.54	0	DiseaseFree	Female	24.54
TCGA-75-5146	Mutant	p.P278H	18.7733	77.79	0	Recurred/Progressed	Male	58.25
TCGA-50-5068	Mutant	p.V216M	18.7831	49.24	1	Recurred/Progressed	Female	22.54
TCGA-05-4405	Mutant	p.C277F	19.8661	20.04	0	DiseaseFree	Female	20.04
TCGA-69-7760	Mutant	p.F270V	20.2729	6.64	0	DiseaseFree	Male	6.64
TCGA-97-7554	Mutant	p.R249W	20.9414	25.46	0	DiseaseFree	Female	25.46
TCGA-50-6593	Mutant	p.V225_splice	21.6213	11.04	1	Recurred/Progressed	Female	8.74
TCGA-44-7662	Mutant	p.E68*	22.2665	7.16	0	DiseaseFree	Male	7.16
TCGA-44-6779	Mutant	p.K132E	22.5619	16.43	1	Recurred/Progressed	Female	7.62
TCGA-44-2661	Wild type		6.5629	38.07	0	DiseaseFree	Female	38.07
TCGA-64-1680	Wild type		12.5407	36.99	0	DiseaseFree	Male	36.99
TCGA-73-4658	Wild type		12.6532	52.56	1	NA	Female	NA
TCGA-67-3773	Wild type		13.5113	14.03	0	DiseaseFree	Female	14.03
TCGA-69-7764	Wild type		14.1097	13.6	0	DiseaseFree	Male	13.6
TCGA-44-7672	Wild type		15.1827	23.62	0	DiseaseFree	Female	23.62
TCGA-50-7109	Wild type		15.2866	10.12	1	Recurred/Progressed	Male	0.49
TCGA-05-4403	Wild type		15.3257	18.99	0	DiseaseFree	Male	18.99
TCGA-55-7725	Wild type		15.3808	14.52	0	DiseaseFree	Female	14.52
TCGA-05-4249	Wild type		15.921	50.03	0	DiseaseFree	Male	50.03
TCGA-69-7761	Wild type		16.5323	6.11	0	DiseaseFree	Male	6.11
TCGA-55-7281	Wild type		16.6268	28.65	0	Recurred/Progressed	Female	11.14
TCGA-67-6216	Wild type		17.5178	4.63	0	DiseaseFree	Female	4.63
TCGA-69-7763	Wild type		17.538	22.67	0	DiseaseFree	Male	22.67
TCGA-49-6744	Wild type		18.2293	55.29	0	DiseaseFree	Female	55.29
TCGA-97-7552	Wild type		18.233	63.47	0	Recurred/Progressed	Male	26.22
TCGA-91-7771	Wild type		18.2433	16.16	0	DiseaseFree	Male	16.16
TCGA-78-7158	Wild type		19.201	5.88	1	Recurred/Progressed	Female	4.34
TCGA-55-6642	Wild type		19.5032	80.45	0	DiseaseFree	Male	80.45
TCGA-49-6745	Wild type		19.6444	17.15	0	DiseaseFree	Male	17.15
TCGA-05-5429	Wild type		20.382	9.03	1	NA	Male	NA
TCGA-78-7152	Wild type		20.6065	39.91	1	Recurred/Progressed	Male	39.49
TCGA-91-6835	Wild type		22.0502	2.6	0	DiseaseFree	Female	2.6

## Sheet: miR-324-5p high
Patient ID	p53 status	p53 mutation	miR-324-5p expression	Overall Survival (Months)	Event	Disease Free Status	Sex	Disease Free (Months)
TCGA-78-7536	Mutant	p.F270C	66.2227	8.02	1	Recurred/Progressed	Male	7.59
TCGA-95-7947	Mutant	p.Y205C	67.3221	15.67	0	DiseaseFree	Male	15.67
TCGA-55-1592	Mutant	p.G244C	68.2924	23.03	1	Recurred/Progressed	Male	14.85
TCGA-67-3771	Mutant	p.S127C	72.032	20.04	0	DiseaseFree	Female	20.04
TCGA-55-1594	Mutant	p.S166*	72.1171	38.7	0	DiseaseFree	Male	38.7
TCGA-05-4432	Mutant	p.D281E	75.5548	25	0	DiseaseFree	Male	25
TCGA-95-7043	Mutant	p.R158L	77.6258	16.52	1	NA	Female	NA
TCGA-69-7980	Mutant	p.A161V	79.4793	13.5	0	DiseaseFree	Female	13.5
TCGA-86-6851	Mutant	p.E258D	80.0052	5.88	0	DiseaseFree	Female	5.88
TCGA-64-5775	Mutant	p.R280G	83.6172	2.04	1	NA	Male	NA
TCGA-05-4424	Mutant	p.L194R	87.9881	29.99	0	Recurred/Progressed	Male	5.03
TCGA-91-6847	Mutant	p.R110L	102.593	27.66	0	Recurred/Progressed	Female	25.36
TCGA-91-6840	Mutant	p.Y220C	110.708	12.22	0	DiseaseFree	Female	12.22
TCGA-64-1677	Mutant	p.D48fs	114.973	20.63	1	Recurred/Progressed	Female	11.83
TCGA-55-1596	Mutant	p.D281Y	118.546	67.84	0	DiseaseFree	Male	67.84
TCGA-78-7155	Mutant	p.R337L	121.362	38.47	1	Recurred/Progressed	Male	6.87
TCGA-55-7907	Mutant	p.R158P	122.183	11.27	1	Recurred/Progressed	Male	9.66
TCGA-50-6673	Mutant	p.R337C	131.772	0.72	1	NA	Female	NA
TCGA-75-6214	Mutant	p.V157F	139.07	36.63	1	Recurred/Progressed	Female	13.76
TCGA-55-6980	Wild type		61.385	69.28	0	DiseaseFree	Male	69.28
TCGA-05-4389	Wild type		61.8149	44.97	0	DiseaseFree	Male	44.97
TCGA-55-6970	Wild type		62.5791	15.24	1	Recurred/Progressed	Female	15.01
TCGA-05-4415	Wild type		64.2208	2.99	1	Recurred/Progressed	Male	1.97
TCGA-67-6217	Wild type		64.3997	13.86	0	Recurred/Progressed	Female	9.72
TCGA-05-4422	Wild type		64.8463	11.99	0	DiseaseFree	Male	11.99
TCGA-73-4662	Wild type		66.2456	82.62	0	Recurred/Progressed	Female	0.69
TCGA-49-4501	Wild type		66.2891	46.68	1	Recurred/Progressed	Female	17.9
TCGA-05-5715	Wild type		72.6693	2.04	0	DiseaseFree	Female	2.04
TCGA-75-7025	Wild type		73.0267	108.57	0	Recurred/Progressed	Male	48.65
TCGA-73-7498	Wild type		76.7454	39.06	0	DiseaseFree	Female	39.06
TCGA-78-7167	Wild type		77.5621	88.07	1	Recurred/Progressed	Male	23.85
TCGA-49-4488	Wild type		77.5787	28.55	1	Recurred/Progressed	Female	20.83
TCGA-55-6983	Wild type		81.0864	92.74	0	DiseaseFree	Male	92.74
TCGA-97-7941	Wild type		85.4493	15.9	0	DiseaseFree	Female	15.9
TCGA-78-7161	Wild type		89.1753	9.56	1	Recurred/Progressed	Female	5.32
TCGA-38-4626	Wild type		94.6163	120.7	0	Recurred/Progressed	Female	82.72
TCGA-55-6972	Wild type		100.271	53.61	1	NA	Male	NA
TCGA-55-6986	Wild type		104.515	107.13	0	DiseaseFree	Female	107.13
TCGA-38-4628	Wild type		112.038	49.01	1	Recurred/Progressed	Female	35.58
TCGA-05-4418	Wild type		115.053	9	1	NA	Male	NA
TCGA-80-5608	Wild type		118.802	93.04	0	DiseaseFree	Female	93.04
TCGA-35-3615	Wild type		120.21	0.46	0	DiseaseFree	Male	0.46
TCGA-67-3774	Wild type		130.579	12.65	0	DiseaseFree	Female	12.65
TCGA-91-6849	Wild type		156.006	1.15	0	DiseaseFree	Female	1.15
